# Supplementary material for: Effect of mitoTEMPO on Redox Reactions in Different Body Compartments upon Endotoxemia in Rats
Source: MDPI journal article supplement (doi:10.3390/biom13050794), 2023-05-05
Supplement: s1 [file s1]

Supplementary Figure S1

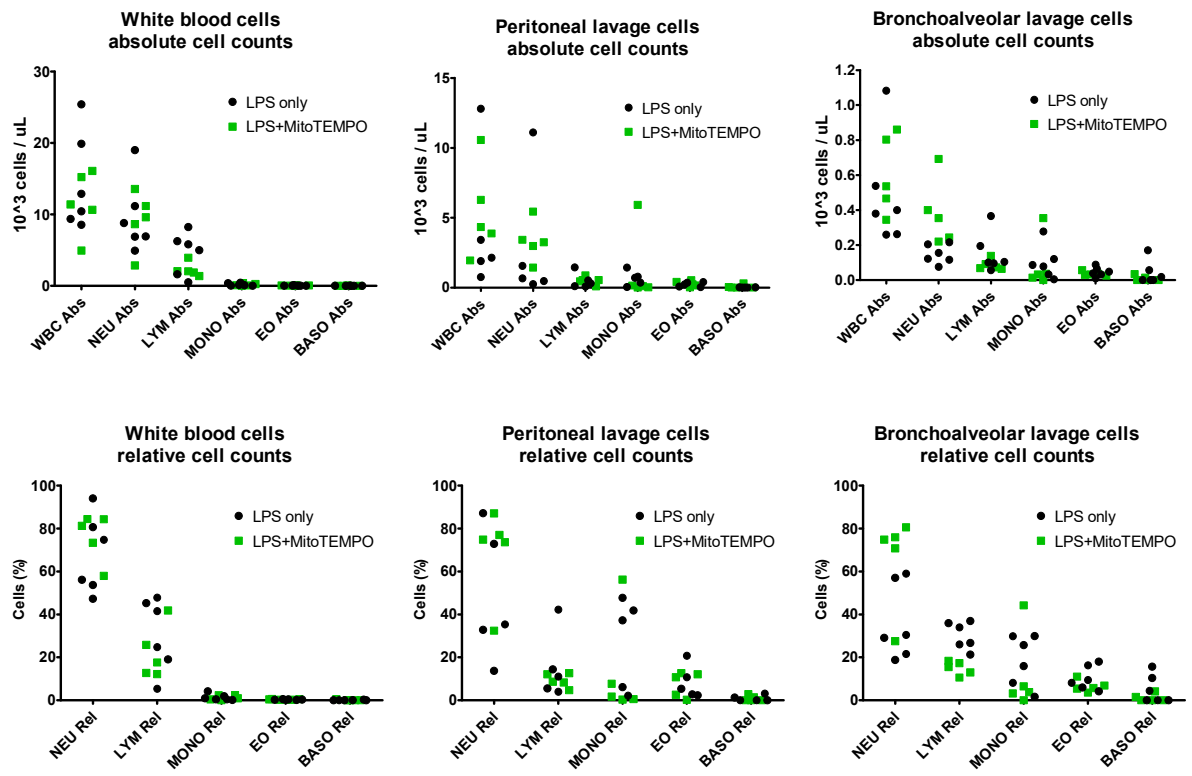

**Supplementary Figure S1.** Effect of mitoTEMPO on cell counts in blood, and peritoneal and bronchoalveolar fluids.
